# Supplementary material for: Characterization and Comparison of Microbiota in the Gastrointestinal Tracts of the Goat (Capra hircus) During Preweaning Development
Source: Front Microbiol. 2019 Sep 13;10:2125. doi: 10.3389/fmicb.2019.02125 (PMC6753876; doi:10.3389/fmicb.2019.02125)
Supplement: Table S9 — The nearest sequenced taxon index (NSTI) for each sample. The NSTI is used to measure the dissimilarity between the predicted metagenome presented here and reference genomes. [file Table_9.XLSX]

## Sheet: Sheet1
Table S9 The nearest sequenced taxon index (NSTI) for each sample. The NSTI is used to measure the dissimilarity between the predicted metagenome presented here and reference genomes.
GIT	Age/d	Sample	Metric	Value
Rumen	0	R0_1	Weighted NSTI	0.0554975
	0	R0_2	Weighted NSTI	0.0619692
	0	R0_3	Weighted NSTI	0.0632309
	14	R14_1	Weighted NSTI	0.112077
	14	R14_2	Weighted NSTI	0.321334
	14	R14_3	Weighted NSTI	0.119482
	28	R28_1	Weighted NSTI	0.217586
	28	R28_2	Weighted NSTI	0.32127
	28	R28_3	Weighted NSTI	0.213321
	42	R42_1	Weighted NSTI	0.109722
	42	R42_2	Weighted NSTI	0.176235
	42	R42_3	Weighted NSTI	0.0895363
	56	R56_1	Weighted NSTI	0.143757
	56	R56_2	Weighted NSTI	0.118618
	56	R56_3	Weighted NSTI	0.187461
Duodenum	0	D0_1	Weighted NSTI	0.0592647
	0	D0_2	Weighted NSTI	0.0618028
	0	D0_3	Weighted NSTI	0.0571403
	14	D14_1	Weighted NSTI	0.125369
	14	D14_2	Weighted NSTI	0.240384
	14	D14_3	Weighted NSTI	0.0778174
	28	D28_1	Weighted NSTI	0.162258
	28	D28_2	Weighted NSTI	0.18902
	28	D28_3	Weighted NSTI	0.182334
	42	D42_1	Weighted NSTI	0.0876981
	42	D42_2	Weighted NSTI	0.159463
	42	D42_3	Weighted NSTI	0.0799631
	56	D56_1	Weighted NSTI	0.14397
	56	D56_2	Weighted NSTI	0.132727
	56	D56_3	Weighted NSTI	0.176769
Jejunum	0	J0_1	Weighted NSTI	0.0617916
	0	J0_2	Weighted NSTI	0.0721813
	0	J0_3	Weighted NSTI	0.121276
	14	J14_1	Weighted NSTI	0.114462
	14	J14_2	Weighted NSTI	0.0781634
	14	J14_3	Weighted NSTI	0.0648549
	28	J28_1	Weighted NSTI	0.118249
	28	J28_2	Weighted NSTI	0.13157
	28	J28_3	Weighted NSTI	0.122069
	42	J42_1	Weighted NSTI	0.0986051
	42	J42_2	Weighted NSTI	0.146367
	42	J42_3	Weighted NSTI	0.100902
	56	J56_1	Weighted NSTI	0.111572
	56	J56_2	Weighted NSTI	0.0950494
	56	J56_3	Weighted NSTI	0.123973
Ileum	0	I0_1	Weighted NSTI	0.0497966
	0	I0_2	Weighted NSTI	0.0915605
	0	I0_3	Weighted NSTI	0.0767621
	14	I14_1	Weighted NSTI	0.085224
	14	I14_2	Weighted NSTI	0.129715
	14	I14_3	Weighted NSTI	0.100513
	28	I28_1	Weighted NSTI	0.093816
	28	I28_2	Weighted NSTI	0.0550559
	28	I28_3	Weighted NSTI	0.0865299
	42	I42_1	Weighted NSTI	0.103017
	42	I42_2	Weighted NSTI	0.155658
	42	I42_3	Weighted NSTI	0.0934318
	56	I56_1	Weighted NSTI	0.099731
	56	I56_2	Weighted NSTI	0.109128
	56	I56_3	Weighted NSTI	0.104374
Cecum	0	Ce0_1	Weighted NSTI	0.054624
	0	Ce0_2	Weighted NSTI	0.133707
	0	Ce0_3	Weighted NSTI	0.0805977
	14	Ce14_1	Weighted NSTI	0.150865
	14	Ce14_2	Weighted NSTI	0.0602761
	14	Ce14_3	Weighted NSTI	0.158917
	28	Ce28_1	Weighted NSTI	0.100896
	28	Ce28_2	Weighted NSTI	0.0668789
	28	Ce28_3	Weighted NSTI	0.0724656
	42	Ce42_1	Weighted NSTI	0.142735
	42	Ce42_2	Weighted NSTI	0.150224
	42	Ce42_3	Weighted NSTI	0.118021
	56	Ce56_1	Weighted NSTI	0.127849
	56	Ce56_2	Weighted NSTI	0.138106
	56	Ce56_3	Weighted NSTI	0.123773
Colon	0	Co0_1	Weighted NSTI	0.0735696
	0	Co0_2	Weighted NSTI	0.0600582
	0	Co0_3	Weighted NSTI	0.0715101
	14	Co14_1	Weighted NSTI	0.14765
	14	Co14_2	Weighted NSTI	0.0592004
	14	Co14_3	Weighted NSTI	0.181103
	28	Co28_1	Weighted NSTI	0.0919748
	28	Co28_2	Weighted NSTI	0.0536067
	28	Co28_3	Weighted NSTI	0.0648658
	42	Co42_1	Weighted NSTI	0.135334
	42	Co42_2	Weighted NSTI	0.157605
	42	Co42_3	Weighted NSTI	0.137853
	56	Co56_1	Weighted NSTI	0.137781
	56	Co56_2	Weighted NSTI	0.13505
	56	Co56_3	Weighted NSTI	0.141769
Mean				0.117459
